# Supplementary material for: A Rubisco-binding protein is required for normal pyrenoid number and starch sheath morphology in Chlamydomonas reinhardtii
Source: PubMed Central journal article supplement — Proc Natl Acad Sci U S A. 2019 Aug 27;116(37):18445–54. doi: 10.1073/pnas.1904587116 (PMC6744930; doi:10.1073/pnas.1904587116), 2019-08-27
Supplement: pnas.1904587116.sapp.pdf [file pnas.1904587116.sapp.pdf]

1 **Supplementary Information**

2 **A Rubisco-binding protein is required for normal pyrenoid number and starch sheath**  
3 **morphology in *Chlamydomonas reinhardtii***

4  
5 Alan K. Itakura<sup>a,b1</sup>, Kher Xing Chan<sup>c,1</sup>, Nicky Atkinson<sup>d</sup>, Leif Pallesen<sup>a</sup>, Gregory Reeves<sup>a</sup>,  
6 Weronika Patena<sup>a,f</sup>, Oliver Caspari<sup>c</sup>, Robyn Roth<sup>f</sup>, Ursula Goodenough<sup>f</sup>, Alistair J.  
7 McCormick<sup>d</sup>, Howard Griffiths<sup>c,2</sup>, Martin C. Jonikas<sup>a,2</sup>

8  
9 <sup>1</sup>A.K.I. and K.X.C. contributed equally to this work.

10

11 <sup>2</sup>To whom correspondence should be addressed.

12 Martin Jonikas (mjonikas@princeton.edu) or Howard Griffiths (hg230@cam.ac.uk)

13

14 **This PDF file includes:**

15 **Figs S1 to S13**

16 **Tables S1 to S6**

17 **SI Materials and Methods**

18 **SI References**

19

20 **SI Figures**

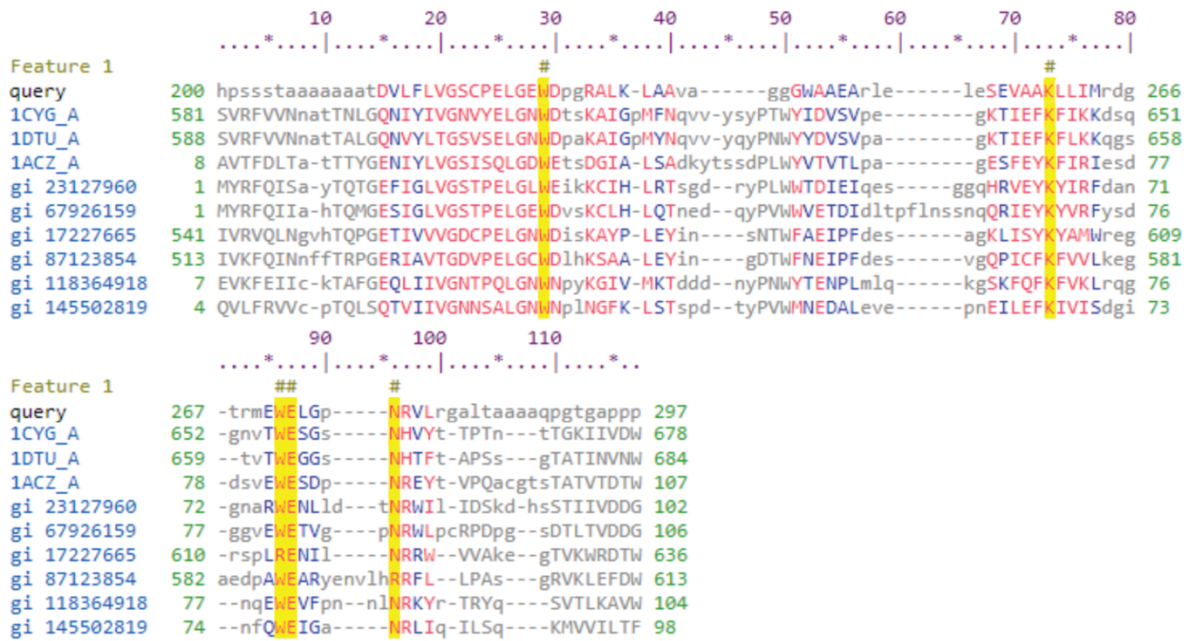

21

22 **Fig. S1.** SAGA1 contains a predicted starch binding domain. SAGA1 (query) was aligned to  
 23 the conserved starch-binding site 1 of a range of proteins from several species (CDD, NCBI  
 24 (52, 53); CBM20; E-value = 1.48e<sup>-08</sup>). This site is suggested to act as an initial starch  
 25 recognition site. 1CYG\_A: Chain A, cyclodextrin glucanotransferase (E.C.2.4.1.19);  
 26 1DTU\_A: Chain A, *Bacillus circulans* strain 251 cyclodextrin glycosyltransferase; 1ACZ\_A:  
 27 Chain A, glucoamylase; gi 23127960: Lysophospholipase L1 and related esterases [*Nostoc*  
 28 *punctiforme* PCC73102]; gi 67926159 Glycoside hydrolase, starch-binding [*Crocospaera*  
 29 *watsonii* WH 8501]; gi 17227665: cyclomalto-dextrin glucanotransferase [*Nostoc* sp. PCC  
 30 7120]; gi 87123854: Glycoside hydrolase, starch-binding [*Synechococcus* sp. RS9917]; gi  
 31 118364918 trehalose-6-phosphate synthase, putative [*Tetrahymena thermophila* SB210]; gi  
 32 145502819: hypothetical protein (macronuclear) [*Paramecium tetraurelia* strain d4-2]. Hash  
 33 mark (#) with yellow highlights: amino acids involved in the starch recognition feature (Feature  
 34 1); Grey lower case: unaligned residues; Upper case: aligned residues used to generate PSSM  
 35 (position-specific scoring matrix); Red to blue color scale: degree of conservation, with red  
 36 designating highly conserved.

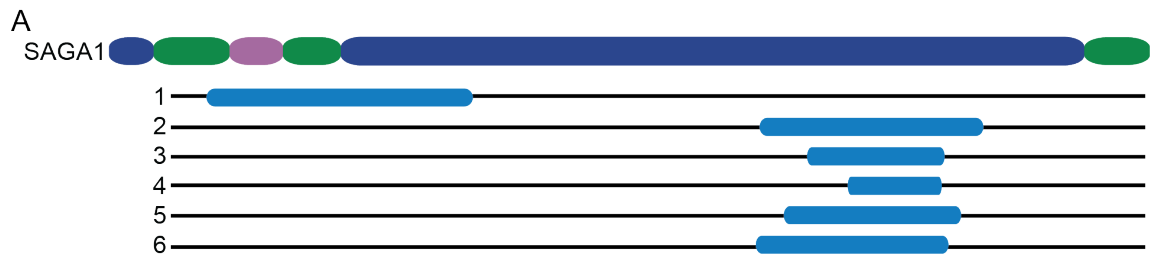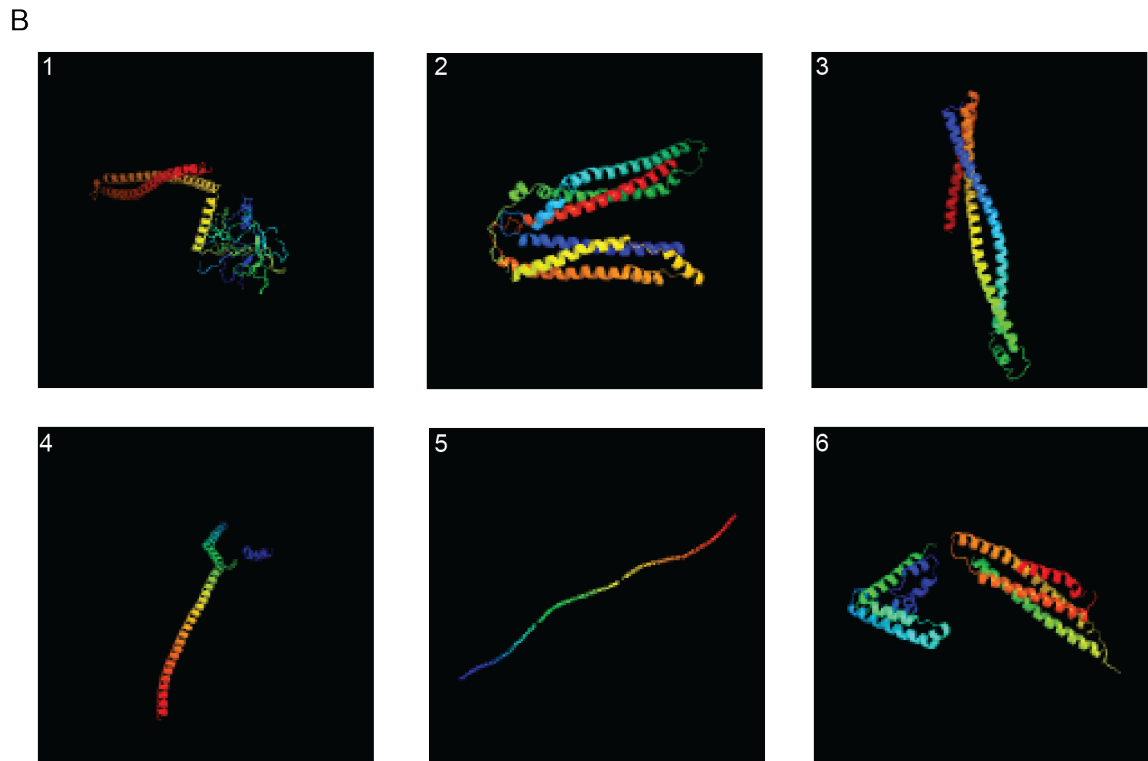

C

| Panel | PDB Template | PDB Header                    | PDB Molecule                                                | PDB Title                                                                                        | Confidence (%) | Identity (%) | Query range(aa) |
|-------|--------------|-------------------------------|-------------------------------------------------------------|--------------------------------------------------------------------------------------------------|----------------|--------------|-----------------|
| 1     | c1jchC_      | ribosome inhibitor, hydrolase | colicin e3                                                  | crystal structure of colicin e3 in complex with its immunity protein                             | 98.6           | 18           | 36-450          |
| 2     | c2oevA_      | protein transport             | programmed cell death 6-interacting protein                 | crystal structure of alix/aip1                                                                   | 98.4           | 10           | 893-1228        |
| 3     | c4cgkA_      | cell cycle                    | secreted 45 kda protein                                     | crystal structure of the essential protein pcsb from streptococcus2 pneumoniae                   | 98.3           | 11           | 950-1157        |
| 4     | c3ojaB_      | protein binding               | anopheles plasmodium-responsive leucine-rich repeat protein | crystal structure of lrim1/apl1c complex                                                         | 98.3           | 10           | 1024-1167       |
| 5     | c1c1gA_      | contractile protein           | tropomyosin                                                 | crystal structure of tropomyosin at 7 angstroms resolution2 in the spermine-induced crystal form | 98.2           | 16           | 920-1198        |
| 6     | c1yv1B_      | signalling protein            | signal transducer and activator of transcription            | structure of unphosphorylated stat1                                                              | 98             | 9            | 875-1170        |

37

38 **Fig. S2.** SAGA1 is predicted to have structural homology to proteins with long alpha helical  
 39 regions. (A) Using Phyre2, the last 1500 amino acids of SAGA1 (due to sequence length

40 submission limitation) were run in intensive mode. Shown is a schema of the top 6 structural  
41 homology results. In blue are the regions of SAGA1 that showed homology to PDB (Protein  
42 DataBase) templates. (B) The tertiary structure of the top 6 structural homology results are  
43 displayed. (C) Details of the top 6 structural homology results. PDB template refers to the  
44 template that SAGA1 was found to have structural homology with. Provided for each result  
45 is the PDB header, the PDB molecule, PDB title, the confidence (the probability that the  
46 match between SAGA1 and the PDB template is a true homology) and identity (coverage)  
47 of the query sequence that has this particular homology.

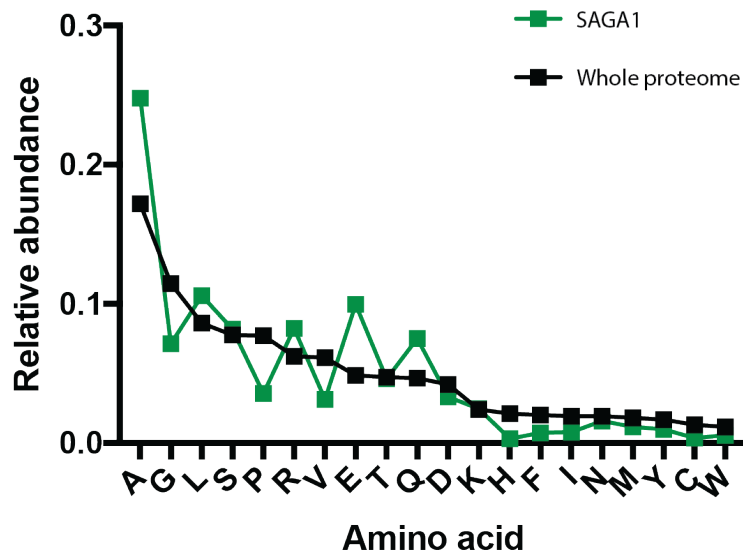

48

49 **Fig. S3.** SAGA1 has an unusual amino acid composition. The relative abundances of each  
 50 amino acid of SAGA1 and the *Chlamydomonas* proteome were calculated as a fraction of the  
 51 total number residues in each. Amino acids are ordered from highest to lowest abundance in  
 52 the *Chlamydomonas* proteome.

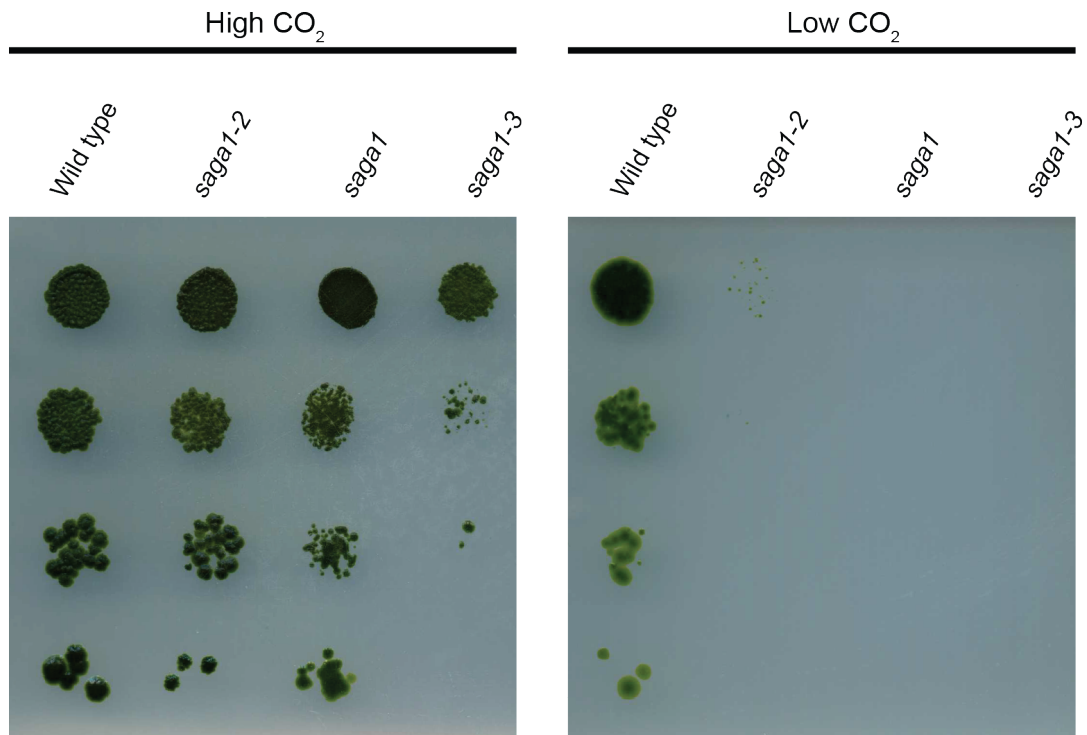

53

54 **Fig. S4.** Other mutant alleles of *saga1* also exhibit a growth defect in low CO<sub>2</sub>. Serial 1:10  
55 dilutions of wild type and 3 independent mutant alleles of *saga1* were spotted on TP minimal  
56 medium and grown at high and low CO<sub>2</sub> under 500  $\mu\text{mol photons m}^{-2}\text{s}^{-1}$  illumination.

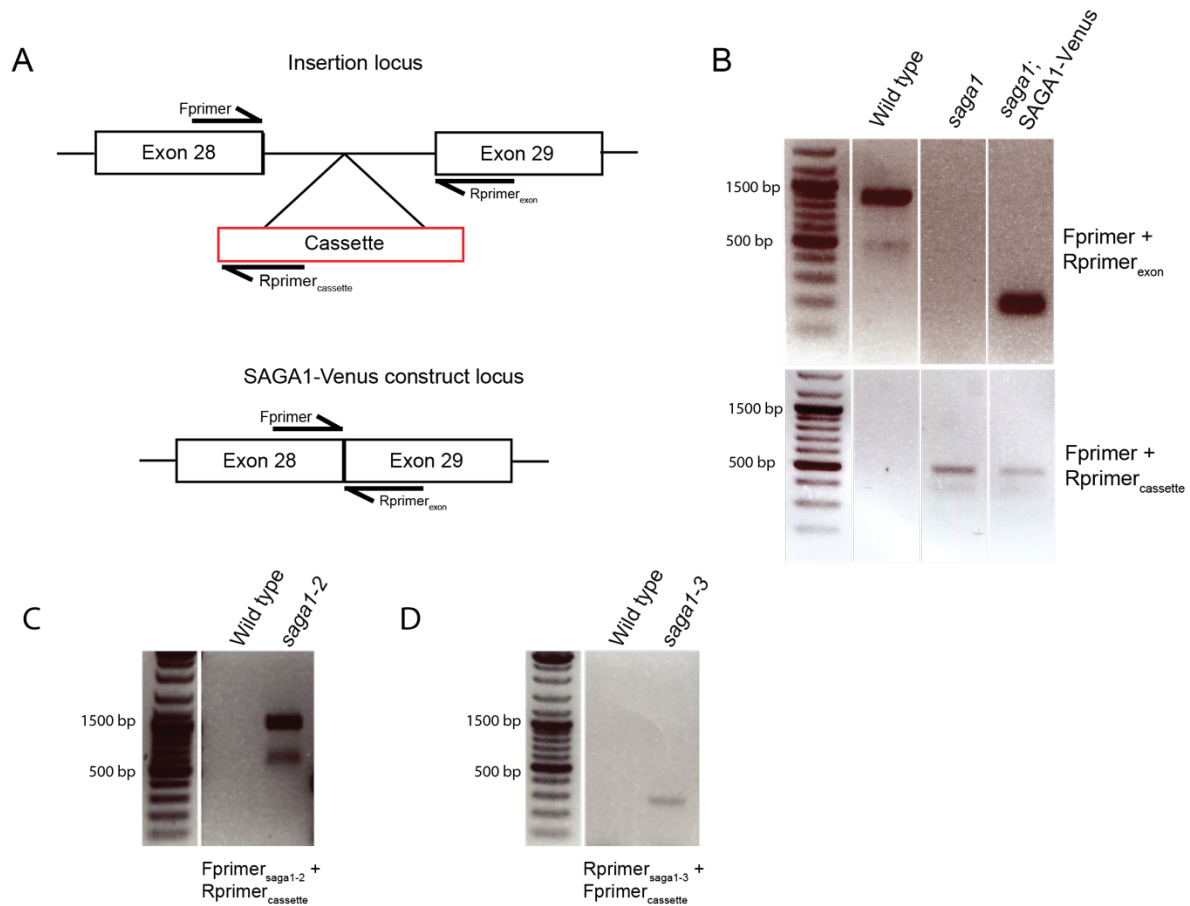

57

58 **Fig. S5.** The complemented *sagal* mutant contains both the insertion cassette and the SAGA1-  
 59 Venus construct. (A) Schema depicting the PCR confirmation strategy of the *sagal* mutant and  
 60 *sagal*;SAGA1-Venus complement. (B) The Fprimer and Rprimer<sub>exon</sub> yielded a 900 bp product  
 61 in the wild type but did not produce a product in the *sagal* mutant due to the presence of the  
 62 insertion cassette. Fprimer and Rprimer<sub>cassette</sub> yielded a 500 bp product in the *sagal* mutant and  
 63 the *sagal*;SAGA1-Venus strain due to the presence of the insertion cassette. In the  
 64 *sagal*;SAGA1-Venus strain, Fprimer and Rprimer<sub>exon</sub> yielded a 250 bp product, smaller than in  
 65 the wild type because the complementation cassette lacks intron 28 (Fig. S13). (C) PCR  
 66 confirming the presence and location of the insertion cassette in the *sagal-2* mutant.  
 67 Fprimer<sub>sagal-2</sub> is upstream of the insertion cassette. The double bands indicate the presence of  
 68 tandem cassette. The *sagal-2* insertion was mapped to intron 28. (D) PCR confirming the  
 69 presence and location of the insertion cassette in the *sagal-3* mutant. Rprimer<sub>sagal-3</sub> is  
 70 downstream of the insertion cassette. Fprimer<sub>cassette</sub> lies at the 3' end of the cassette. The  
 71 insertion was mapped to intron 25. Primer sequences can be found in Table S6.

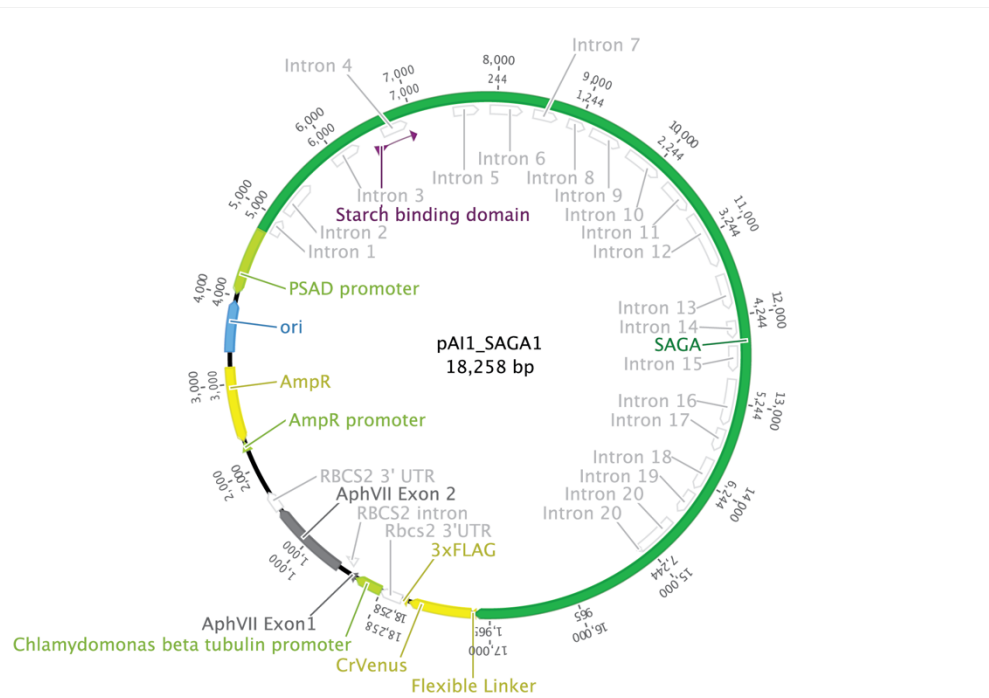

72

73 **Fig. S6.** The pRAM118-SAGA1 construct. The *SAGA1* gene includes the first 20 introns; the  
 74 remaining introns were omitted during gene synthesis. *SAGA1* is driven by a *PSAD* promoter  
 75 and is followed by a *CrVenus* tag and a *3xFLAG* tag. The construct contains *AmpR* cassette for  
 76 ampicillin resistance in *E. coli* and an *AphVII* cassette for hygromycin selection in *C.*  
 77 *reinhardtii*. The construct is derived from pLM005, but with an *AphVII* for hygromycin  
 78 resistance instead of *AphIII* for paromomycin resistance. The construct and sequence can be  
 79 found at the Chlamydomonas Resource Center as pRAM118\_SAGA1\_Venus\_3xFLAG.



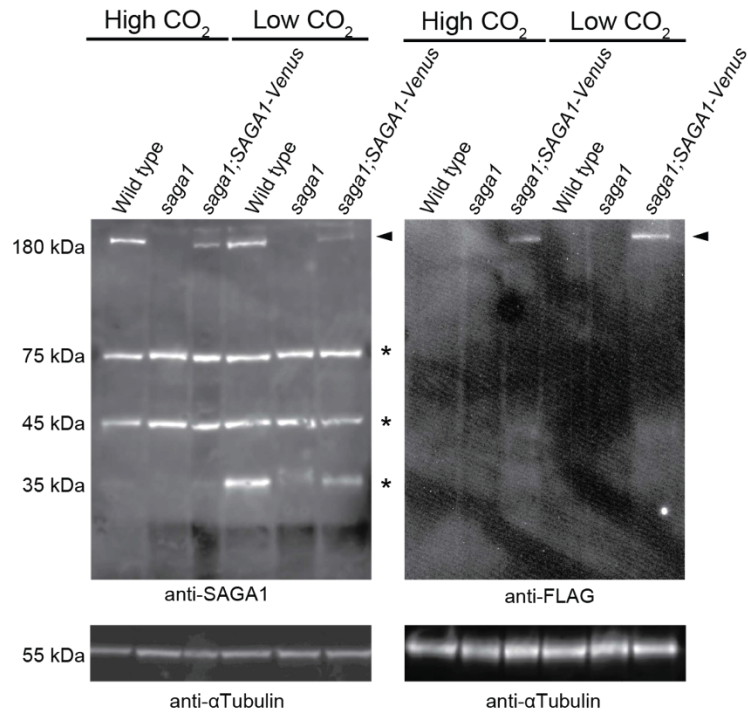

80

81 **Fig. S7.** Full membranes from Fig. 1D. SAGA1 protein levels in wild-type, *saga1*, and  
 82 *saga1;SAGA1-Venus* cells grown at low and high CO<sub>2</sub> were probed with an anti-SAGA1  
 83 polyclonal antibody and with an anti-FLAG antibody. Arrow indicates the *SAGA1* protein  
 84 product. The asterisks indicate non-specific bands. Anti-tubulin is shown as a loading control.

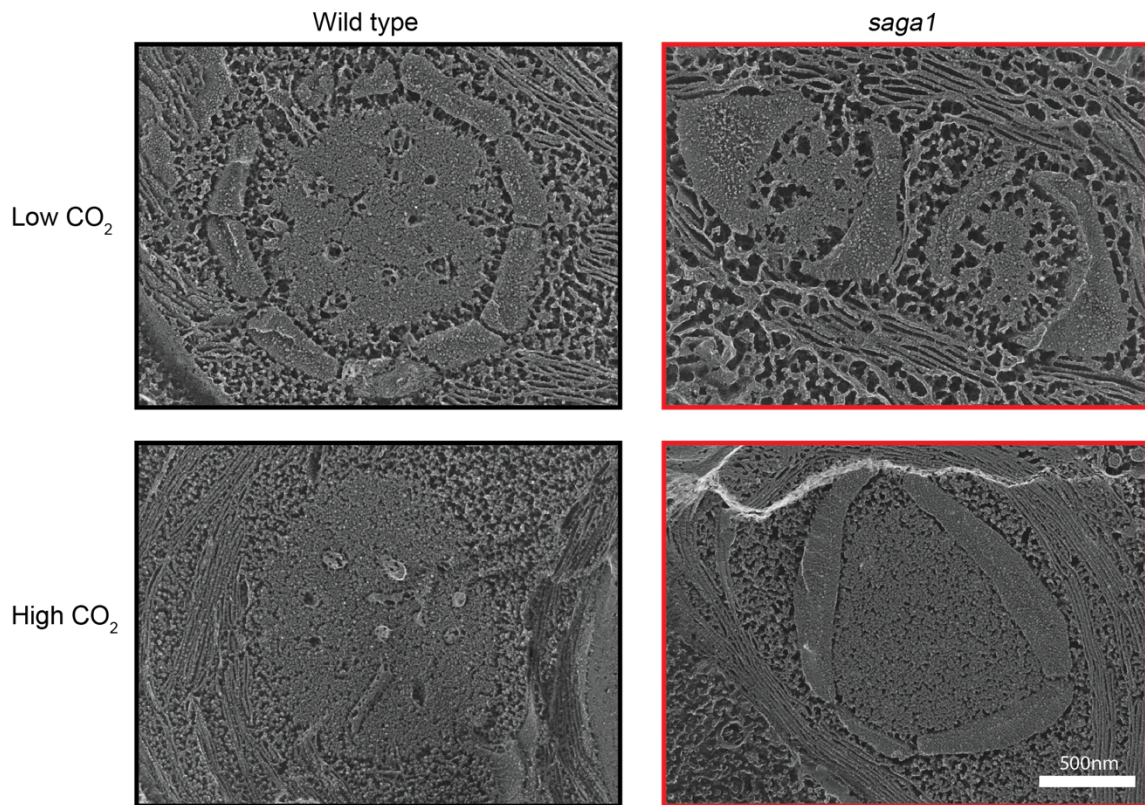

85

86 **Fig. S8.** Quick-freeze deep-etch cryo-electron microscopy reveals abnormal pyrenoid structure  
87 in the *saga1* mutant. Representative quick-freeze deep-etch cryo-electron microscopy images  
88 of cells grown in high and low CO<sub>2</sub> highlighting multiple pyrenoids, abnormal starch sheaths,  
89 and a decreased number of thylakoid tubules in the *saga1* mutant. Samples were fixed with  
90 glutaraldehyde prior to electron microscopy. Scale bar = 500nm.

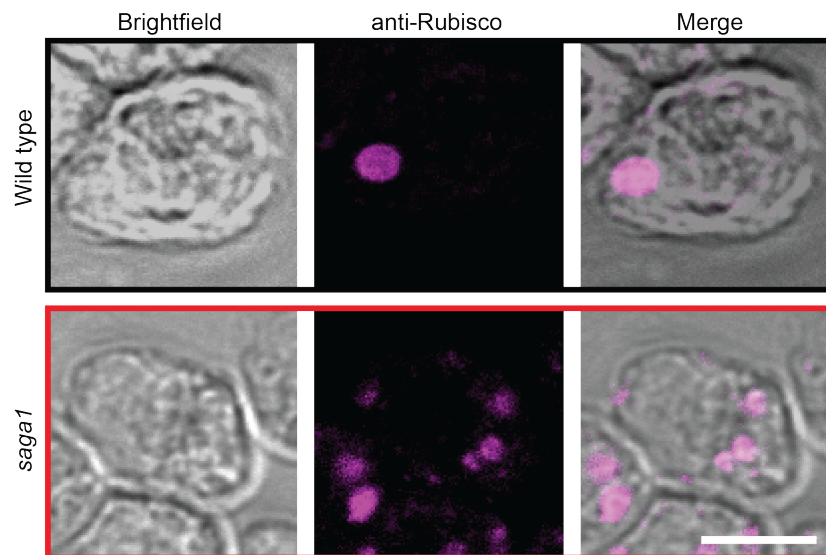

91  
92 **Fig. S9.** Rubisco is localized to the pyrenoids of wild-type and *saga1* mutant *Chlamydomonas*  
93 *reinhardtii* cells grown in low CO<sub>2</sub>. Subcellular localization of Rubisco in wild-type and *saga1*  
94 mutant cells shown by indirect immunofluorescence assay using an anti-Rubisco antibody.  
95 Multiple Rubisco localization sites could be observed in each *saga1* mutant cell, in contrast to  
96 a single site in each wild-type cell. Scale bar = 5 μm.

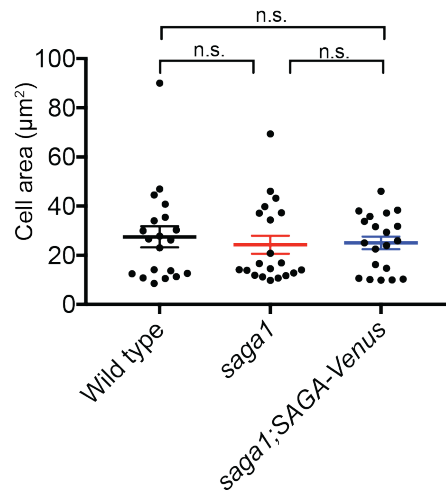

97

98 **Fig. S10.** *saga1* mutant cells are of similar size to wild-type cells. The areas of wild-type,

99 *saga1*, and *saga1;SAGA1-Venus* cells imaged using TEM were quantified (N=10 cells; Mann

100 Whitney *U* test; n.s., not significant). Error bars: SEM.

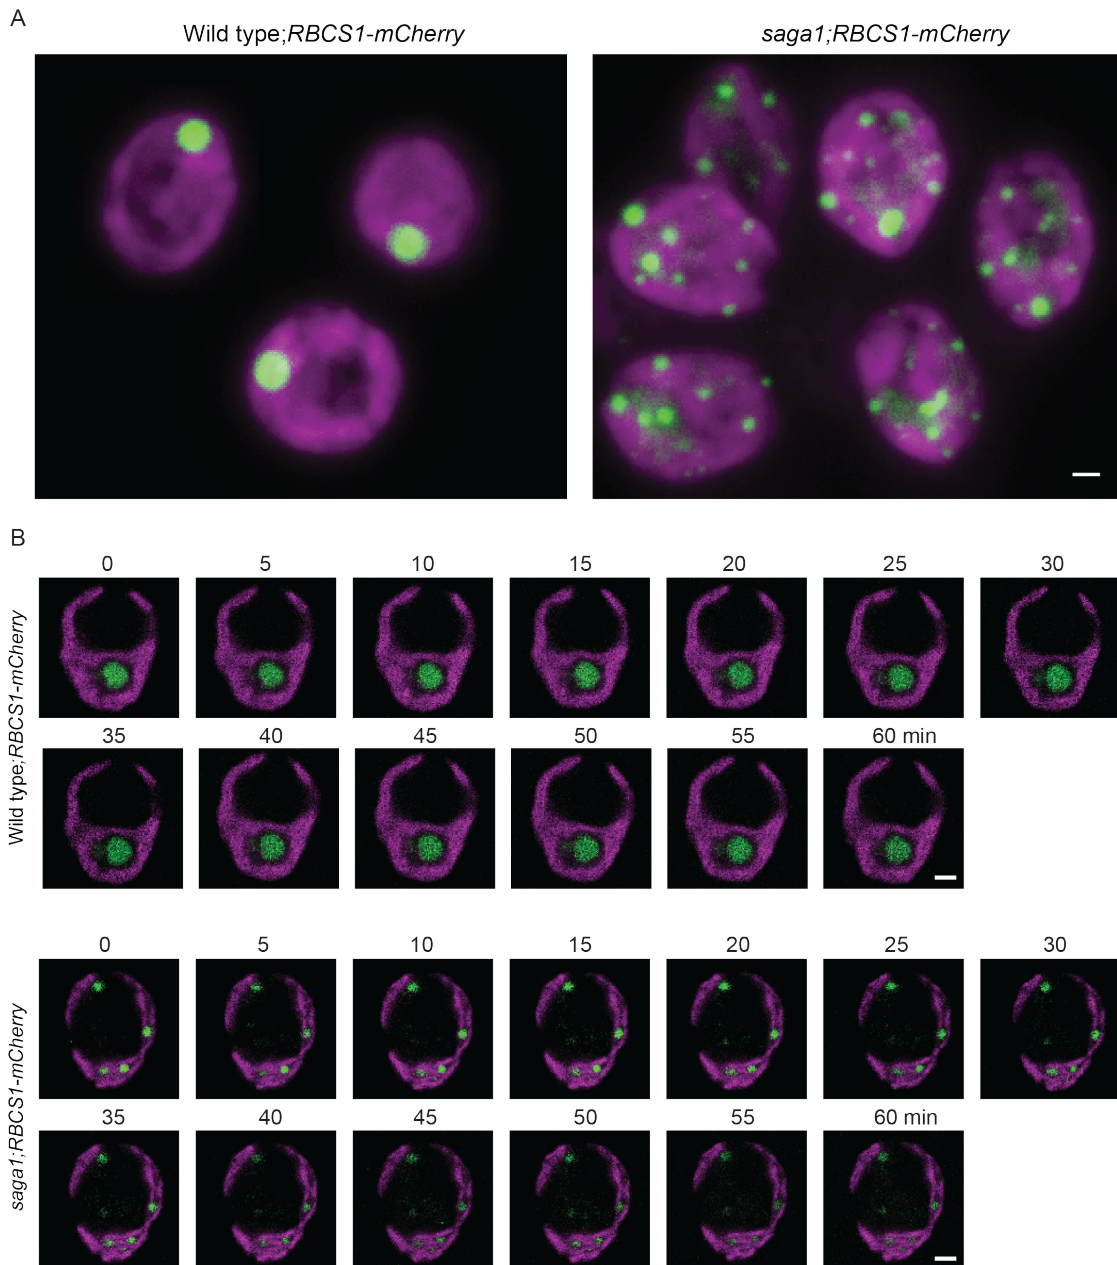

101

102 **Fig. S11.** The *saga1* mutant has multiple stable pyrenoids. (A) Representative summed z-stacks  
 103 of a field of *saga1* and wild-type cells constitutively expressing RBCS1-mCherry grown in low  
 104 CO<sub>2</sub>. One cell from each field view is also shown in Fig. 3. (B) A 1-hour time course of *saga1*  
 105 and wild-type cells expressing RBCS1-mCherry. Green is RBCS1-mCherry fluorescence and  
 106 magenta is chlorophyll autofluorescence. Scale bar = 1 μm.

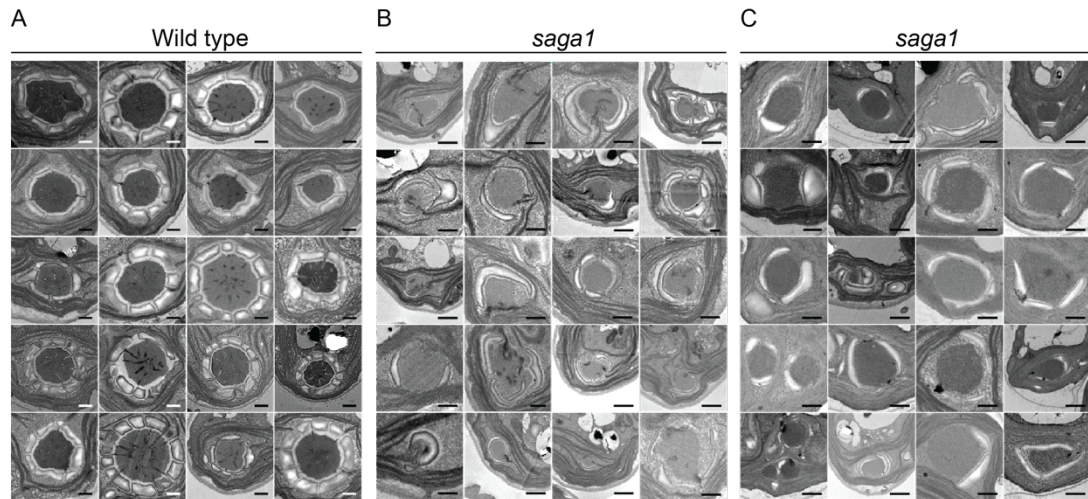

107

108 **Fig. S12.** Pyrenoids in the *saga1* mutant occasionally contain thylakoid tubules. (A) TEM  
 109 images of wild-type pyrenoids. (B) TEM images of *saga1* mutant pyrenoids with thylakoid  
 110 tubules. (C) TEM images of *saga1* mutant pyrenoids without visible thylakoid tubules. Scale  
 111 bar = 500nm.

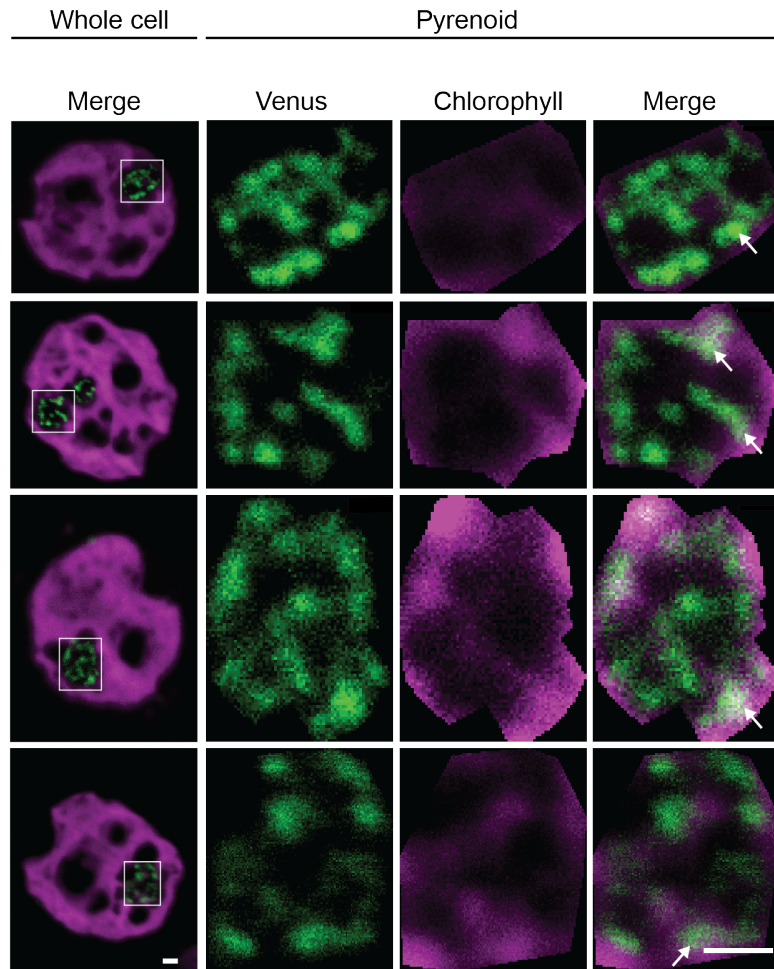

112

113 **Fig. S13.** SAGA1 partially colocalizes with chlorophyll autofluorescence in the pyrenoid.  
 114 Representative confocal fluorescent microscopy images of SAGA1-Venus (green)  
 115 constitutively expressed in *sagal* mutant cells grown in low CO<sub>2</sub>. Magenta is chlorophyll  
 116 autofluorescence. White arrows indicate white coloration arising from overlap of SAGA1-  
 117 Venus and chlorophyll autofluorescence. Spearman rank rho values calculated from pixel  
 118 intensities of the SAGA1-Venus fluorescence and the chlorophyll autofluorescence are listed  
 119 in Table S5. Left: scale bar = 1 μm. Right: scale bar = 500nm.

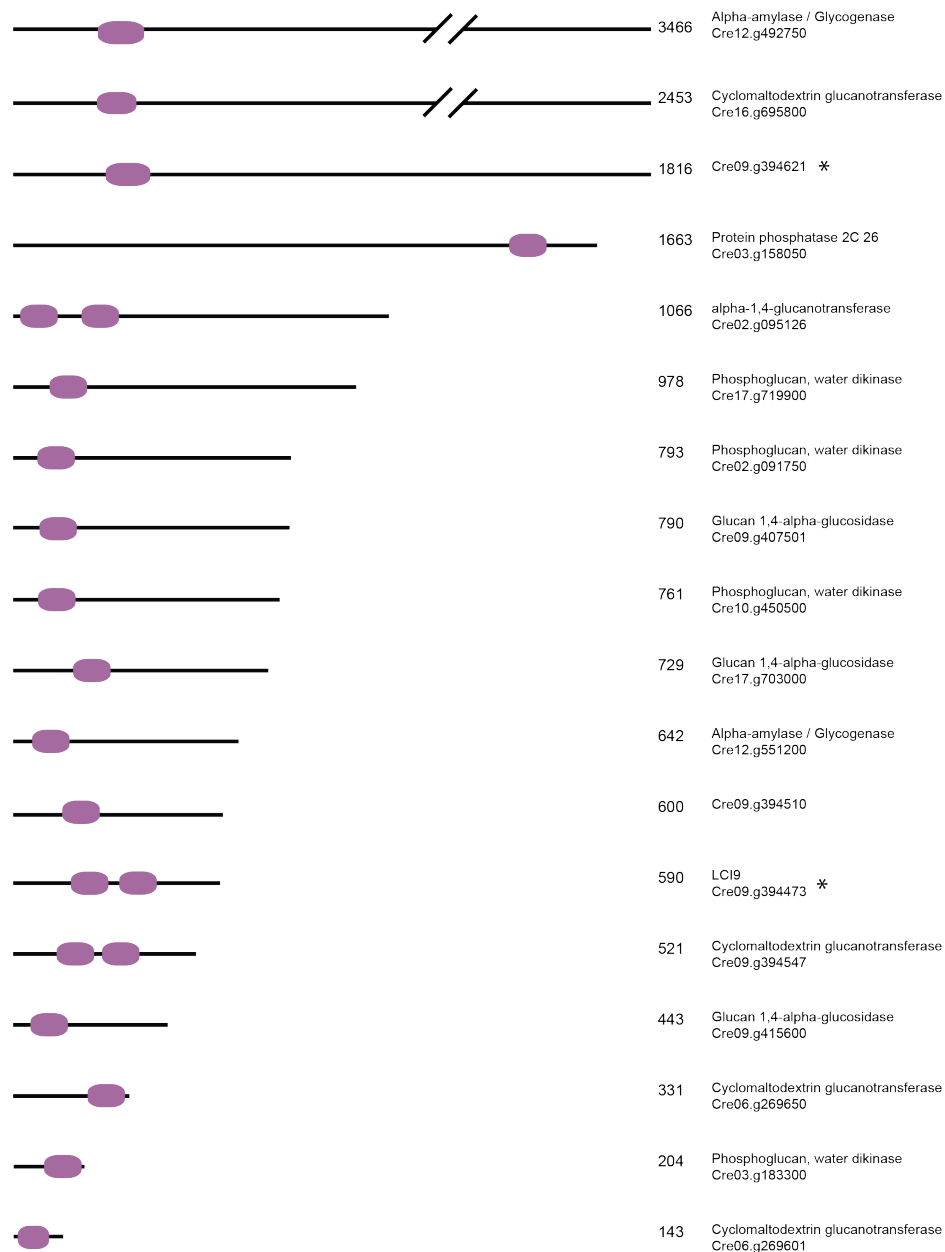

120

121 **Fig. S14.** *Chlamydomonas reinhardtii* proteins with putative starch binding domains. A cartoon  
 122 depiction of the 18 *C. reinhardtii* proteins that have the CBM\_20 motif (PFAM00686;  
 123 Phytozome). Length of the protein is relative to Cre09.g394621. Included is the gene name and  
 124 the description of the gene. The asterisks indicate proteins that interacted with components of  
 125 the pyrenoid matrix by immunoprecipitation-mass spectrometry (26)



127 **Table S1.** Protein BLAST results using the SAGA1 starch binding domain (residues 212-280) as a query sequence.

| Species                              | Description                  | Uniprot ID | Gene ID           | Starch binding domain     | Coiled-coil | Length | Query sequence | Identity | E-value  | Score |
|--------------------------------------|------------------------------|------------|-------------------|---------------------------|-------------|--------|----------------|----------|----------|-------|
| <i>Chlamydomonas reinhardtii</i>     | Uncharacterized protein      | A0A2K3D7T6 | CHLRE_11g467712v5 | 178-308                   | 678         | 1626   | SAGA1 SBD      | 100.00%  | 9.60E-47 | 389   |
| <i>Tetraabaena socialis</i>          | Uncharacterized protein      | A0A2J7ZZR0 | TSOC_007957       | 65-171                    | 562         | 1462   | SAGA1 SBD      | 59.40%   | 1.40E-19 | 207   |
| <i>Volvox carteri f. nagariensis</i> | Uncharacterized protein      | D8TYS9     | VOLCADRAFT_105158 | 98-206, 232-354           | 403         | 1552   | SAGA1 SBD      | 41.30%   | 2.90E-09 | 138   |
| <i>Gonium pectorale</i>              | Uncharacterized protein      | A0A150GJ96 | GPECTOR_19g330    | 78-203, 226-334           | 974         | 3,273  | SAGA1 SBD      | 45.50%   | 6.40E-08 | 129   |
| <i>Gonium pectorale</i>              | Uncharacterized protein      | A0A150G832 | GPECTOR_49g527    | 14-117                    | 167         | 672    | SAGA1 SBD      | 39.10%   | 1.20E-07 | 127   |
| <i>Volvox carteri f. nagariensis</i> | Uncharacterized protein      | D8TPI1     | VOLCADRAFT_88626  | 186-296, 325-432, 509-617 | 694         | 2801   | SAGA1 SBD      | 41.50%   | 5.00E-07 | 123   |
| <i>Raphidocelis subcapitata</i>      | Uncharacterized protein      | A0A2V0PDF5 | Rsub_08056        | 42-143                    | 449         | 1201   | SAGA1 SBD      | 46.20%   | 7.00E-07 | 122   |
| <i>Chlamydomonas reinhardtii</i>     | alpha amylase?               | A0A2K3D1W5 | CHLRE_12g492750v5 | 210-323, 344-468, 491-599 | 1306        | 3466   | SAGA1 SBD      | 42.20%   | 7.10E-07 | 122   |
| <i>Chlamydomonas reinhardtii</i>     | Uncharacterized protein      | A0A2K3DEF8 | CHLRE_09g394621v5 | 96-206, 221-343           | 410         | 1748   | SAGA1 SBD      | 43.10%   | 9.9E-7   | 121   |
| <i>Gracilariopsis chorda</i>         | Kinesin-like protein KIN-14R | A0A2V3IYN9 | BWQ96_03906       | 204-325, 669-996          | 99          | 1357   | SAGA1 SBD      | 56.40%   | 2.8E-6   | 118   |
| <i>Chlorella variabilis</i>          | Uncharacterized protein      | E1ZG60     | CHLNCDRAFT_52636  | 119-233                   | 49          | 541    | SAGA1 SBD      | 45.30%   | 3.70E-06 | 117   |

128 Top 10 results from a Protein BLAST using the Uniprot BLAST portal (unitprot.org). Target database was Eukaryota. Predicted starch binding  
129 domains (CBM20) were identified using Interpro; listed are the corresponding a.a. residues. The total length of coiled-coil secondary structures  
130 was determined using UniProt's Automatic Annotation pipeline. Identity is a measurement of how similar the query sequence is to the target  
131 sequence. E-value is a statistical measure to estimate the number of expected matches in a random database. Score is a normalized metric for how

132 similar the sequences are, independent of sequence length and database size. E-Threshold was set at 10. BLOSUM62 matrix was used for  
133 alignment. No filtering was used. Gaps were permitted.

134 **Table S2.** Protein BLAST results using SAGA1 as a query sequence.

| Species                          | Description                     | Uniprot ID | Gene ID           | Starch binding domain | Coiled-coil (total a.a.) | Length (a.a.) | Query sequence | Identity | E-value  | Score |
|----------------------------------|---------------------------------|------------|-------------------|-----------------------|--------------------------|---------------|----------------|----------|----------|-------|
| <i>Chlamydomonas reinhardtii</i> | Uncharacterized protein         | A0A2K3D7T6 | CHLRE_11g467712v5 | 178-308               | 678                      | 1,626         | SAGA1          | 100.00%  | 0        | 7,807 |
| <i>Tetraabaena socialis</i>      | Uncharacterized protein         | A0A2J7ZZR0 | TSOC_007957       | 65-171                | 562                      | 1,462         | SAGA1          | 54.50%   | 0        | 3,603 |
| <i>Chlamydomonas reinhardtii</i> | Uncharacterized protein         | A8J9W7     | CHLREDRAFT_151809 | N/A                   | 373                      | 577           | SAGA1          | 78.60%   | 0        | 1,992 |
| <i>Gonium pectorale</i>          | Uncharacterized protein         | A0A150FZL5 | GPECTOR_106g128   | N/A                   | 507                      | 1,080         | SAGA1          | 46.10%   | 0        | 1,746 |
| <i>Volvox carteri</i> *          | Mitotic checkpoint protein MAD1 | N/A        | Vocar.0009s0363   | 192-305               | ~1000                    | 1,639         | SAGA1          | 37.60%   | 1.50E-97 | 1414  |
| <i>Chlorella sorokiniana</i>     | TPR repeat-containing protein   | A0A2P6TEU7 | C2E21_8179        | N/A                   | 343                      | 4,188         | SAGA1          | 27.10%   | 2.80E-82 | 801   |
| <i>Porphyra umbilicalis</i>      | Uncharacterized protein         | A0A1X6PGC9 | BU14_0071s0060    | N/A                   | 154                      | 2,312         | SAGA1          | 27.60%   | 7.10E-82 | 796   |
| <i>Chlorella sorokiniana</i>     | Kinesin K39 isoform A           | A0A2P6TPQ7 | C2E21_5045        | N/A                   | 956                      | 2,826         | SAGA1          | 27.70%   | 8.80E-82 | 796   |
| <i>Chlamydomonas reinhardtii</i> | Uncharacterized protein         | A0A2K3DKA0 | CHLRE_07g336750v5 | N/A                   | 2450                     | 3,869         | SAGA1          | 28.50%   | 2.30E-80 | 785   |
| <i>Emiliania huxleyi</i>         | Uncharacterized protein         | R1EUH6     | EMIHUDRAFT_113389 | N/A                   | 1856                     | 4,388         | SAGA1          | 27.80%   | 3.20E-80 | 784   |
| <i>Gonium pectorale</i>          | Uncharacterized protein         | A0A150G2C5 | GPECTOR_75g720    | N/A                   | 1374                     | 1,898         | SAGA1          | 26.30%   | 1.30E-79 | 776   |

135 Top 10 results from a Protein BLAST using the Uniprot BLAST portal (unitprot.org). Target database was Eukaryota. Column titles are as in

136 Table S1. \* indicates that this result was identified using Phytozome (phytozome.jgi.doe.gov) Protein BLAST.

137 **Table S3.** Photosynthetic  $K_{0.5}$  ( $C_i$ ) of wild-type, *sagal* and *sagal;SAGAI-Venus-3xFLAG*  
 138 cultures.

| Sample                          | Conditions | $K_{0.5}$ ( $C_i$ ) ( $\mu$ M) | p-value                |
|---------------------------------|------------|--------------------------------|------------------------|
| Wild type                       | HC         | 115.8 $\pm$ 24.2               | -                      |
|                                 | LC         | 38.7 $\pm$ 11.8                | -                      |
| <i>sagal</i>                    | HC         | 775.5 $\pm$ 88.7               | 1.0 x 10 <sup>-5</sup> |
|                                 | LC         | 160.0 $\pm$ 19.1               | 0.00015                |
| <i>sagal;SAGAI-Venus-3xFLAG</i> | HC         | 267.4 $\pm$ 84.3               | 0.20929                |
|                                 | LC         | 41.9 $\pm$ 26.3                | 0.91083                |

139 Data are shown as average  $\pm$  standard error, which were obtained from at least three  
 140 independent experiments. The paired t-test was used to determine the significance compared  
 141 to wild type.  $C_i$ , inorganic carbon; HC, high CO<sub>2</sub>; LC, low CO<sub>2</sub>.

142 **Table S4.** Rubisco fraction in the pyrenoid or stroma of wild-type cells and the *sagal* mutant.

| Sample       | Average area of pyrenoid cross section (nm <sup>2</sup> ) | Average area of chloroplast cross section (nm <sup>2</sup> ) | Normalized immunogold particle count (particles nm <sup>-2</sup> ), <i>N</i> |                              | Rubisco in pyrenoid (%) | Comparison to wild type (adjusted p-value) |
|--------------|-----------------------------------------------------------|--------------------------------------------------------------|------------------------------------------------------------------------------|------------------------------|-------------------------|--------------------------------------------|
|              |                                                           |                                                              | Pyrenoid, <i>N<sub>i</sub></i>                                               | Stroma, <i>N<sub>j</sub></i> |                         |                                            |
| Wild type    | 9.25 x 10 <sup>6</sup>                                    | 120.11 x 10 <sup>6</sup>                                     | 140 ± 17.0                                                                   | 6 ± 1.3                      | 93.8                    | -                                          |
| <i>sagal</i> | 7.91 x 10 <sup>6</sup>                                    | 113.21 x 10 <sup>6</sup>                                     | 50 ± 8.6                                                                     | 4 ± 0.8                      | 90.3                    | n.s.                                       |

143 The percentage of Rubisco in the pyrenoid was calculated as described in the Supplementary

144 Methods. The data shown are the means ± SEM.

145 **Table S5.** Spearman rank rho values calculated from pixel intensities of the SAGA1-Venus  
 146 fluorescence and chlorophyll autofluorescence.

|         | Spearman rank rho | <i>p</i> -value | Expected mean ± SD                                            |
|---------|-------------------|-----------------|---------------------------------------------------------------|
| Image 1 | 0.0336            | <0.0001         | 0.0028±0.0042                                                 |
| Image 2 | 0.038             | <0.0001         | 0.0027±0.0034                                                 |
| Image 3 | 0.1128            | <0.0001         | 6.6577e <sup>-04</sup> ±9.2904e <sup>-04</sup> <sup>147</sup> |
| Image 4 | 0.0699            | <0.0001         | 0.0015±0.0022 148                                             |
| Control | 0.0023            | ns              | 0.0016±0.0024 149                                             |

150 Expected Spearman-rank rho distributions (a nonparametric measure of the statistical  
 151 dependence between the two rankings of two variables, ranging from 0 (no dependence) to 1  
 152 (complete dependence)) were created for each image using 100 independently scrambled pixel  
 153 intensity values of the chlorophyll and Venus channels. The expected means and standard  
 154 deviations were calculated from these simulated rho distributions. *p*-values were calculated by  
 155 comparing the observed Spearman rank rho to the distribution of simulated Spearman-Rank  
 156 rho values (*Z*-score test).

157 **Table S6.** Primers used to confirm the location of the *sagal* mutants.

158

| Primer Name                         | Sequence               |
|-------------------------------------|------------------------|
| Fprimer ( <i>sagal</i> )            | GCATTGAGATCCGAGATGGT   |
| Rprimer cassette                    | GCACCAATCATGTCAAGCCT   |
| Rprimer exon ( <i>sagal</i> )       | AGTCCAGGCCGACTACTCC    |
| Rprimer exon ( <i>sagal-3</i> )     | GTGTGAGTGGGATCGCATTCAT |
| Fprimer cassette ( <i>sagal-3</i> ) | GACGTTACAGCACACCCTTG   |
| Fprimer ( <i>sagal-2</i> )          | CCCACCCCTCACATAAACAC   |
| Rprimer cassette ( <i>sagal-2</i> ) | GCACCAATCATGTCAAGCCT   |

159

## 160 **SI Materials and Methods**

### 161 **Screening for the *saga1* mutant**

162 ~7,500 mutants on 79 plates, each with 96 colonies were grown on solid TP media in high and  
163 low CO<sub>2</sub> in 100 μmol photons m<sup>-2</sup> s<sup>-1</sup> light. Mutants that required high CO<sub>2</sub> were sequenced as  
164 described in (54). Three mutant alleles mapped to the SAGA1 locus. *saga1*: ~12,590 nt (Intron  
165 26); *saga1-2*: ~13,370 nt (Intron 28); *saga1-3*: ~12,070 nt (Intron 25). The mutants were  
166 confirmed by PCR using a primer that originated from the mutagenesis cassette and a primer  
167 in the SAGA1 gene flanking the insertion site. All primers used are in SI Appendix (Table S6).

### 168 **SAGA1 Sequence Analysis**

169 The full length amino acid sequence of SAGA1 was subjected to PSIPRED (55), NCBI CDD  
170 (52) and Phyre2 (56) analyses to identify predicted secondary structures, regions of disordered  
171 protein and putative domains.

### 172 **Generation of the *saga1*;SAGA1-Venus line**

173 Because of the challenge of amplifying across the entire gene, 3 fragments with ~40 nt overlap  
174 for Gibson assembly were synthesized (NeoScientific and GeneWiz). These 3 fragments and  
175 the resulting construct contained all the exons but only the first 20 introns of SAGA1. Introns  
176 21-34 were removed due to highly repetitive sequences that made them difficult to synthesize  
177 and amplify. The 3 fragments were Gibson-assembled into an expression vector that includes  
178 a C-terminus Venus and FLAG tag, along with *AphVII* gene for hygromycin resistance under  
179 a beta2-tubulin promoter.

180 Using this construct, we transformed the *saga1* mutant by electroporation as in (45).  
181 For each transformation, 14.5 ng kb<sup>-1</sup> of *EcoRV*-digested construct was mixed with 250 μL of  
182 2 x 10<sup>8</sup> cells mL<sup>-1</sup> and transformed immediately into *saga1* strains. Cells were selected for  
183 hygromycin resistant colonies on hygromycin TAP plates (25 μg mL<sup>-1</sup>). These colonies were  
184 picked into 180 μl of TAP with hygromycin (25 μg mL<sup>-1</sup>) in a 96-well plate and screened for  
185 fluorescence using a Tecan Infinite M1000 PRO plate reader. Excitation and emission settings  
186 were: Venus, 532 excitation with 555/20 emission; chlorophyll autofluorescence, 633  
187 excitation with 670/30 emission.

188 Of the 9 colonies that exhibited a high Venus/chlorophyll fluorescence ratio, 2 showed  
189 pyrenoid localization. These 2 complements with pyrenoid Venus fluorescence were the only  
190 that rescued the CCM phenotype.

### 191 **Western Blotting**



192 *Chlamydomonas* cells were grown to mid-log phase ( $1 \times 10^6$  cells mL<sup>-1</sup>) and then harvested by  
193 centrifugation at 5,000 x g. Total protein extraction, detection and quantification of SAGA1 in  
194 wild type and *saga1* mutant were performed using method described in (51). Protein was  
195 extracted from flash-frozen cells, normalized to chlorophyll absorbance, separated by SDS-  
196 PAGE, and western blots were performed with different antibodies.

197 The primary anti-SAGA1 antibody was used at a 1:10,000 dilution and the secondary  
198 horseradish-peroxidase (HRP) conjugated goat anti-rabbit (Life Technologies) at a 1:10,000  
199 dilution. The primary anti-Rubisco antibody was used at a 1:50,000 dilution and the secondary  
200 horseradish-peroxidase (HRP) conjugated goat anti-rabbit (Life Technologies) or a goat anti-  
201 Rabbit IgG (1:10,000 dilution). To ensure even loading, membranes were stripped (Restore  
202 PLUS western blot stripping buffer, Thermo Scientific) and re-probed with anti-tubulin  
203 (1:25,000; Sigma) or anti-Histone H3 (1:10,000; abcam) followed by HRP conjugated goat  
204 anti-mouse (1:10,000; Life Technologies) or goat anti-Rabbit IgG (H+L) 800 CW (1:5,000;  
205 LiCOR).

206 The anti-SAGA1 antibody was raised in rabbit to the last 19 amino acids of C-terminal  
207 tail of SAGA1 (RGTGDSPTRRAFGDWRKLN-cooh) by Yenzym Antibodies (South San  
208 Francisco, California, USA). The anti-Rubisco polyclonal antibody was a gift from Prof. John  
209 Gray, University of Cambridge.

## 210 **Oxygen Evolution**

211 *Chlamydomonas* cells grown in Tris-phosphate medium were harvested by centrifugation at  
212 3,000 x g for 3 min at 20°C and resuspended in 25 mM HEPES-KOH (pH 7.3) to the  
213 concentration of about 200 µg chlorophyll mL<sup>-1</sup> using the equations from (57). Aliquots of cells  
214 (1 mL) were added to an OXYV1 Hansatech Oxyview System (Hansatech Instruments, King's  
215 Lynn, UK) maintained at 23°C using a circulating water bath. The chamber was sealed and  
216 illuminated with 200-300 µmol photons m<sup>-2</sup> s<sup>-1</sup> until the cells had depleted the internal  
217 inorganic carbon storage. When net oxygen evolution ceased, 10-µl aliquots of sodium  
218 bicarbonate were added to the cells at 30-s intervals. The cumulative concentrations of HCO<sub>3</sub><sup>-</sup>  
219 after each addition were as follows: 2.5, 5, 10, 25, 50, 100, 250, 500, 1000 and 2000 µM. The  
220 rate of oxygen evolution was recorded per second using the PicoLog 1216 Data Logger (Pico  
221 Technologies, St. Neots, UK). K<sub>0.5</sub> values were calculated using the Michaelis-Menten  
222 equation.

## 223 **Fixing and Embedding for TEM**

224 *Chlamydomonas* cells were harvested by centrifugation at 5,000 x g and fixed for 1 h at room  
225 temperature with fixation buffer (2% (v/v) glutaraldehyde, 0.01% (v/v) hydrogen peroxide in  
226 TP medium)). Samples were then fixed and osmicated for 1 h at room temperature in an  
227 osmium mix (1% (v/v) OsO<sub>4</sub>, 1.5% (w/v) K<sub>3</sub>[Fe(CN)<sub>6</sub>], 2 mM CaCl<sub>2</sub>). Bulk staining was  
228 performed with 2% (w/v) uranyl acetate for 1 h at room temperature. At the interval of each of  
229 the subsequent step, three 5 min washes with distilled water were performed. Samples were  
230 dehydrated progressively in 70% (v/v) and 95% (v/v) ethanol, followed by two washes in 100%  
231 ethanol and 100% acetonitrile.

232 The samples were then embedded in epoxy resin (34% (w/v) Quetol 651, 44% (w/v)  
233 nonenyl succinic anhydride, 20% (w/v) methyl-5-norbornene-2,3-dicarboxylic anhydride, and  
234 2% (w/v) catalyst dimethylbenzylamine (Agar Scientific, Essex, UK)). The fixed cells were  
235 first mixed with a mixture of acetonitrile and epoxy resin at a ratio of 1:1 and left to settle  
236 overnight. Over the next two days, the cells were refreshed with 100% epoxy resin. Lastly, the  
237 samples were cured at 60°C for at least 24 h.

238 Sections of 50 nm thickness were prepared with a Leica Ultracut UCT (Leica  
239 Microsystems, Milton Keynes, UK), mounted on 300 mesh copper grids and counterstained  
240 with uranyl acetate followed by lead citrate (Ms. Lyn Carter, Cambridge Advanced Imaging  
241 Centre, UK).

## 242 **Immunogold labeling**

243 Samples mounted on 300 mesh nickel grids were treated with 4% (w/v) Na-meta-periodate for  
244 15 min and 1% (w/v) periodic acid for 5 min to remove superficial osmium and unmask the  
245 epitopes. Then, the samples were blocked for 5 min in blocking buffer of 1% BSA (w/v) in  
246 high-salt Tris-buffered saline (HSTBSTT) (0.05% (v/v) Tween 20, 0.05% (v/v) Triton X-100  
247 and 500 mM NaCl). The sections were then incubated overnight at room temperature with  
248 diluted antibody (1:1000 dilutions of rabbit anti-Rubisco antibody in blocking buffer) followed  
249 by two 5-min washes in HSTBSTT and two 5-min washes in dH<sub>2</sub>O. To detect bound antibody,  
250 the sections were incubated with a secondary antibody (1:200 dilutions of goat anti-rabbit 15-  
251 nm gold conjugates (BBI Solutions, Cardiff, UK) in blocking buffer) for 1 h at room  
252 temperature followed by two 5-min washes in HSTBSTT and two 5-min washes in dH<sub>2</sub>O. The  
253 sections were dried and kept for further observation.

254 Sections were examined using TEM and evaluation of immunogold labeling was made  
255 by using the cell counter and measurement functions of ImageJ2 (Fiji). The percentage of

256 aggregation of gold particles in pyrenoid and chloroplast stromal area was calculated using  
257 these equations:

258 Particle density in the pyrenoid,

$$259 \quad d = \frac{n_i}{A_i} \quad (1)$$

260

261 Normalized number of particles in the pyrenoid,

$$262 \quad N_i = (d_i - d_k) \times n_i \quad (2)$$

263

264 Calculated percentage of Rubisco aggregation in the pyrenoid,

$$265 \quad \%N_i = \frac{N_i}{N_i + N_j} \times 100 \quad (3)$$

266

267 Where  $d$  = density,  $n$  = number of particles counted,  $N$  = normalized number of particles,  $A$  =  
268 measured area,  $i$  = pyrenoid,  $j$  = chloroplast stroma,  $k$  = background.

269

270 Calculation of particle density of the background of every image:

271 Non-pyrenoid/chloroplast area,

$$272 \quad A_k = A_{all} - (A_i + A_j) \quad (4)$$

273 Particle density of the background of every image,

$$274 \quad d_k = \frac{n_{other}}{A_k} \quad (5)$$

275 Where  $n_{other}$  is the number of particles counted in the non-pyrenoid/chloroplast area.

276

277 Normalized number of particles in the chloroplast stroma,  $j$ , was derived from equation (2):

$$278 \quad N_j = (d_j - d_k) \times n_j$$

## 279 **Indirect Immunofluorescence**

280  $10^6$  cells were concentrated to a volume of 500  $\mu$ l and fixed on the poly-L-lysine-coated slides  
281 for 10 min and the excess media was removed from the slides. The slides were placed in cold  
282 methanol and incubated at -20°C for about 10 min. After then, the dehydrated cells were  
283 rehydrated by incubating the slides in 1X PBS for 5 min. This step was repeated twice. After  
284 that, Permeating Solution (2% (v/v) of Triton X-100 in 1X PBS) was added to the jar and  
285 incubated for 10 min at room temperature followed by two washes in PBS-Mg solution (5 mM  
286 MgCl<sub>2</sub> in 1X PBS) for 10 min each then air-dried. About 80  $\mu$ l of Blocking Solution (1% BSA,  
287 1% cold water fish gelatin, 0.05% Triton X-100 and 0.05% Tween20 in 1X PBS) was pipetted  
288 onto each cover slip and the slides were inverted onto the cover slips followed by 30 min  
289 incubation at room temperature in the humid chambers. After that, about 80  $\mu$ l of primary  
290

291 antibody was added to the cells as described previously. The slides were then placed in the  
292 humid chambers and incubated overnight at 4°C.

293 The next day, the slides were washed thrice with 1X PBS for 5 min at room temperature.  
294 Secondary antibody was added to the slides as described previously and incubated at room  
295 temperature for 1 h. After the three washes with 1X PBS for 5 min each, the slides were then  
296 air-dried and mounted. First, about 25 µl of ProLong® Gold Antifade Reagent (Life  
297 Technologies) was added onto the slide and a cover slip was then inverted over the droplet.  
298 The mounted slides were left to dry overnight in the dark at 4°C.

299 Primary antibodies used for indirect immunofluorescence were anti-Rubisco (1:2,000)  
300 and anti-SAGA antibodies (1:2,000 dilution) while the secondary antibody used was the Alexa  
301 Fluor 488 Goat anti-Rabbit IgG (H+L) antibody (Invitrogen; 1:1,000).

### 302 **Pyrenoid quantification using Rbcs1-mCherry fluorescence**

303 15 Z-sections were taken per cell at 100x magnification. Cell boundaries were defined using  
304 chlorophyll autofluorescence. 3D pyrenoid reconstructions were generated from Z-stacks  
305 sections using Imaris software (Bitplane). Pyrenoids were defined as ‘vesicle like objects’  
306 using mCherry fluorescence, and then quantified.

### 307 **Quick-freeze deep-etch EM (QFDEEM)**

308 150 mL of each of air-bubbled cultures and 75 mL of high CO<sub>2</sub>- bubbled cultures were pelleted  
309 at 1,000 g for 10 min at RT to produce pellets of ~200 µL. The pellets were resuspended in 6  
310 mL of ice-cold 10 mM HEPES buffer (pH 7) and transferred to a cold 25 mL glass flask. A  
311 freshly prepared solution of 4% glutaraldehyde (Sigma-Aldrich G7651) in 10 mM HEPES (pH  
312 7) was added 100 µL at a time, swirling between drops, until 1.5 mL in total had been added.  
313 The mixture was then left on ice for 1 hour, with agitation every 10 min. The mixture was  
314 pelleted (1000 g, 5 min, 4° C), washed in cold HEPES buffer, pelleted again, and finally  
315 resuspended in 6 mL fresh HEPES. Samples were shipped overnight to St. Louis in 15 mL  
316 conical screw cap tubes maintained at 0-4° C.

317 Microscopy QFDEEM was performed as previously described in (14, 58).

318

319 **SI References**

- 320 14. Mackinder LCM, et al. (2016) A repeat protein links Rubisco to form the eukaryotic  
321 carbon-concentrating organelle. *Proc Natl Acad Sci* 113(21):5958–5963.
- 322 45. Zhang R, et al. (2014) High-Throughput Genotyping of Green Algal Mutants Reveals  
323 Random Distribution of Mutagenic Insertion Sites and Endonucleolytic Cleavage of  
324 Transforming DNA. *Plant Cell* 26:1398–1409.
- 325 48. Schindelin J, et al. (2012) Fiji: An open-source platform for biological-image analysis.  
326 *Nat Methods* 9(7):676–682.
- 327 49. Schneider CA, Rasband WS, Eliceiri KW (2012) NIH Image to ImageJ: 25 years of  
328 image analysis. *Nat Methods* 9(7):671–675.
- 329 50. Rueden CT, et al. (2017) ImageJ2: ImageJ for the next generation of scientific image  
330 data. *BMC Bioinformatics* 18(529):1–26.
- 331 51. Heinnickel ML, et al. (2013) Novel Thylakoid Membrane GreenCut Protein CPLD38  
332 Impacts Accumulation of the Cytochrome b6f Complex and Associated Regulatory  
333 Processes. *J Biol Chem* 288(10):7024–7036.
- 334 52. Marchler-Bauer A, et al. (2017) CDD/SPARCLE: Functional classification of proteins  
335 via subfamily domain architectures. *Nucleic Acids Res* 45(D1):D200--D203.
- 336 53. Sorimachi K, Le Gal-Coëffet MF, Williamson G, Archer DB, Williamson MP (1997)  
337 Solution structure of the granular starch binding domain of *Aspergillus niger*  
338 glucoamylase bound to  $\beta$ -cyclodextrin. *Structure* 5(5):647–661.
- 339 54. Li X, et al. (2016) An Indexed, Mapped Mutant Library Enables Reverse Genetics  
340 Studies of Biological Processes in *Chlamydomonas reinhardtii*. *Plant Cell* 28(2):367–  
341 387.
- 342 55. Jones DT (1999) Protein secondary structure prediction based on position-specific  
343 scoring matrices. *J Mol Biol* 292:195–202.
- 344 56. Kelley LA, Mezulis S, Yates CM, Wass MN, Sternberg MJE (2015) The Phyre2 web  
345 portal for protein modelling, prediction, and analysis. *Nat Protoc* 10(6):845–858.
- 346 57. Porra RJ, Thompson WA, Kriedemann PE (1989) Determination of accurate extinction  
347 coefficients and simultaneous equations for assaying chlorophylls a and b extracted  
348 with four different solvents: verification of the concentration of chlorophyll standards  
349 by atomic absorption spectroscopy. *Biochim Biophys Acta* 975:384–394.
- 350 58. Heuser JE (2011) The origins and evolution of freeze-etch electron microscopy. *J*  
351 *Electron Microsc (Tokyo)* 60(Supplement 1):3–29.
